# Supplementary material for: Regulation of mTORC1 by lysosomal calcium and calmodulin
Source: eLife journal article supplement (doi:10.7554/elife.19360), 2016-10-27
Supplement: supp [file elife-19360-supp-v1.zip]

Archive with 9 entries (9 files):
- elife_poa_e19360_Figure_3_figure_supplement_2.pdf
- elife_poa_e19360_Figure_4_figure_supplement_1.pdf
- elife_poa_e19360_Figure_4_figure_supplement_2.pdf
- elife_poa_e19360_Figure_1_figure_supplement_1.pdf
- elife_poa_e19360_Figure_4_figure_supplement_3.pdf
- elife_poa_e19360_Figure_4_figure_supplement_4.pdf
- elife_poa_e19360_Figure_3_figure_supplement_1.pdf
- elife_poa_e19360_Figure_2_figure_supplement_2.pdf
- elife_poa_e19360_Figure_2_figure_supplement_1.pdf
