# Supplementary material for: Regulation of mTORC1 by lysosomal calcium and calmodulin
Source: eLife journal article supplement (doi:10.7554/elife.19360), 2016-10-27
Supplement: supp [file elife-19360-supp-v1.zip › elife_poa_e19360_Figure_2_figure_supplement_1.pdf]

**Figure 2-figure supplement 1**

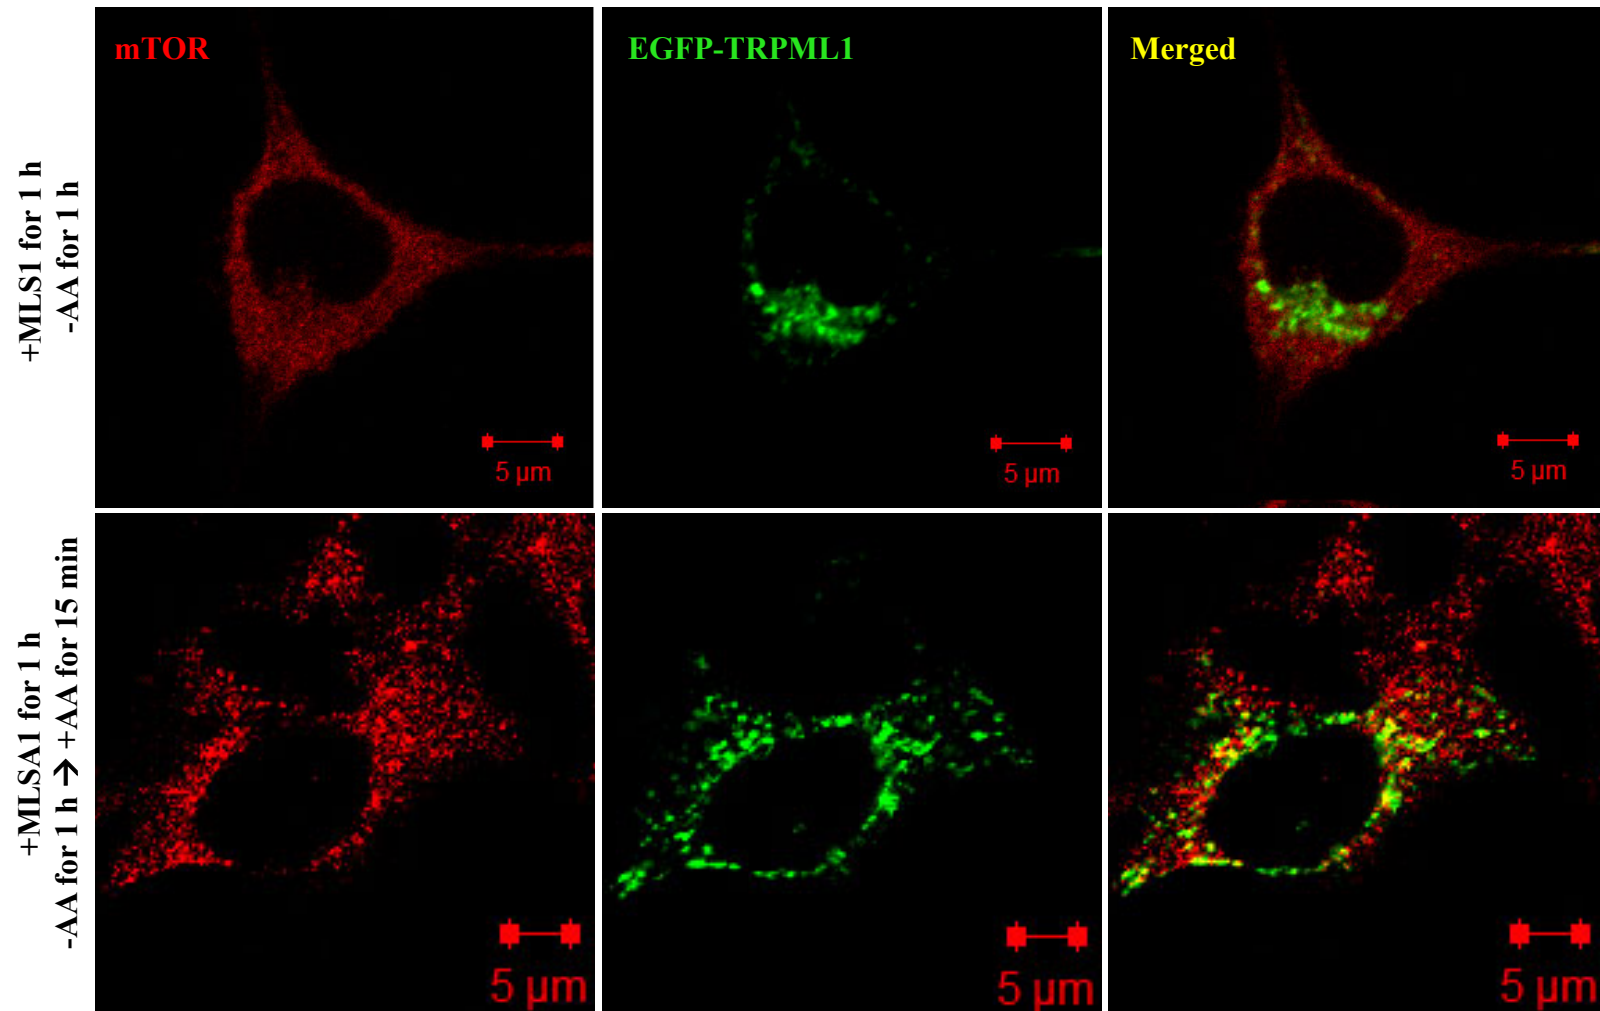

**Figure 2-figure supplement 1.** Colocalization of EGFP-TRPML1 and mTOR. HEK293T cells were transfected with EGFP-TRPML1 expression plasmid. After 18 hours, cells were treated with MLSA1 (15 µM) for 1 hour, and starved with amino acids for 1 hour, or starved with amino acids for 1 hour and restimulated with amino acids for 15 min. Cells were fixed, stained with anti-mTOR antibody and images were captured using a Zeiss LSM510 confocal microscope.
