# Supplementary material for: Regulation of mTORC1 by lysosomal calcium and calmodulin
Source: eLife journal article supplement (doi:10.7554/elife.19360), 2016-10-27
Supplement: supp [file elife-19360-supp-v1.zip › elife_poa_e19360_Figure_2_figure_supplement_2.pdf]

**Figure 2-figure supplement 2**

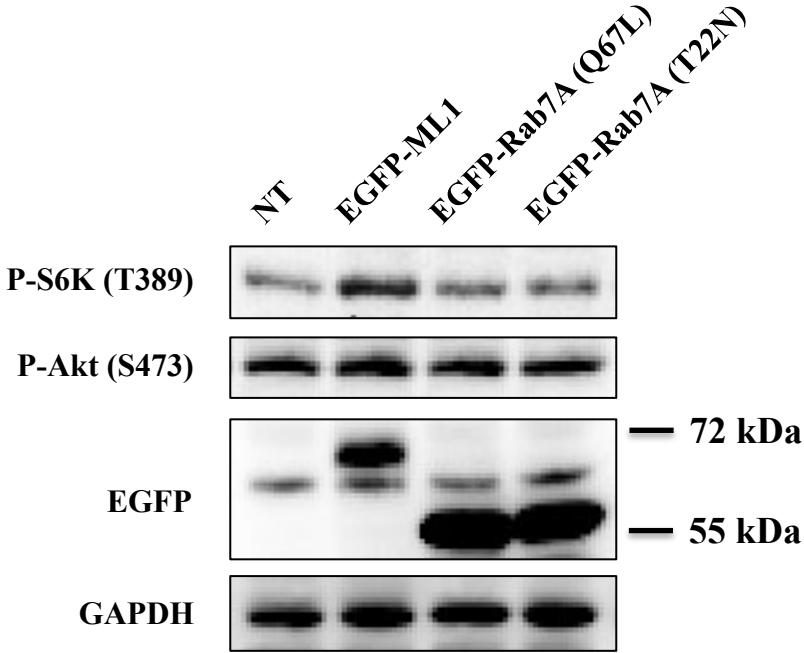

**Figure 2-figure supplement 2.** Effects of constitutively active or dominant negative Rab 7A. HEK293T cells were transfected with EGFP-ML1, EGFP-Rab7A (Q67L) or EGFP-Rab7A (T22N). After 19 hours, the cells transfected with EGFP-ML1 were treated with MLSA1 (20  $\mu$ M) for 1 hour. Cells were lysed and subjected to immunoblotting.
