# Supplementary material for: Regulation of mTORC1 by lysosomal calcium and calmodulin
Source: eLife journal article supplement (doi:10.7554/elife.19360), 2016-10-27
Supplement: supp [file elife-19360-supp-v1.zip › elife_poa_e19360_Figure_3_figure_supplement_1.pdf]

## Figure 3-figure supplement 1

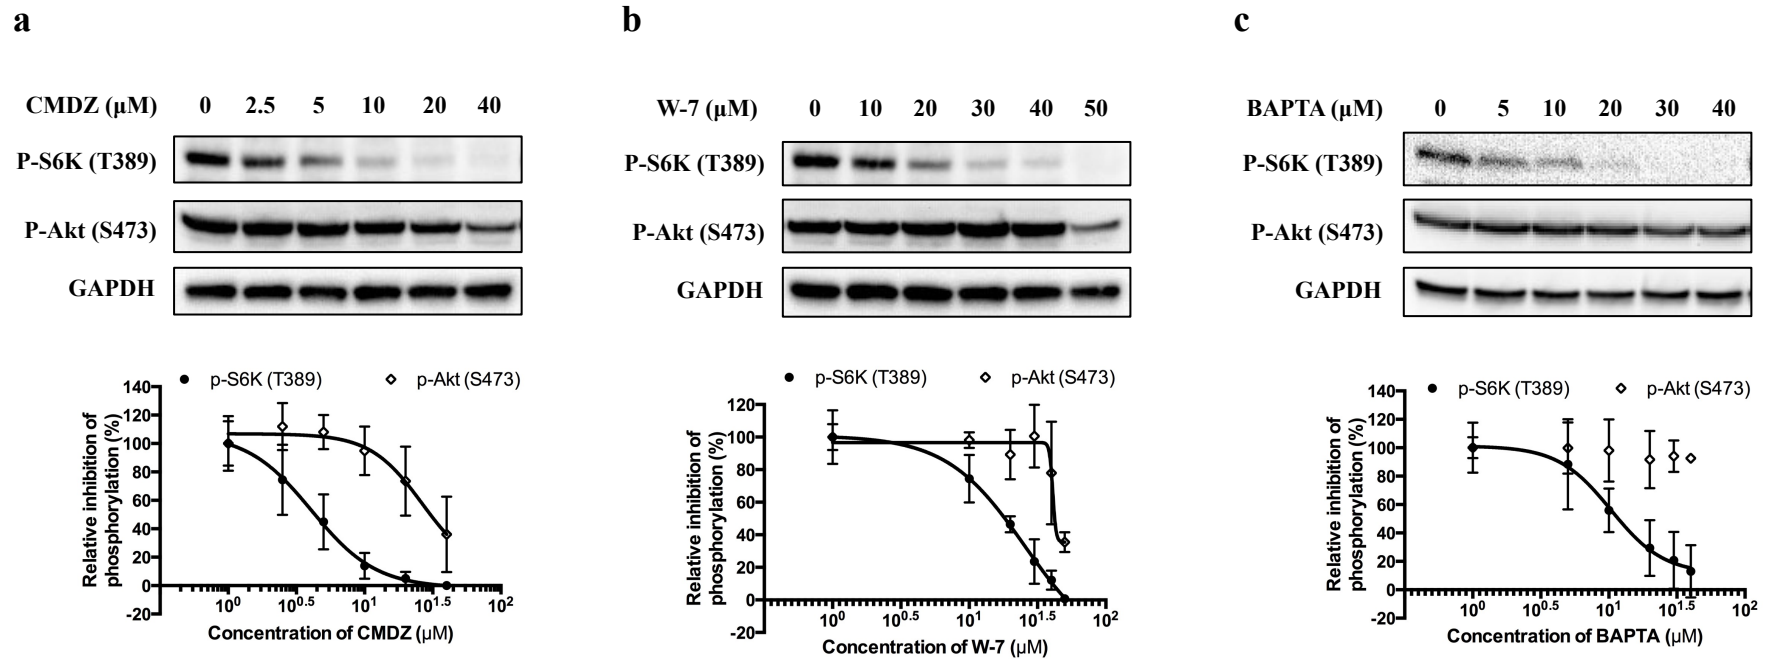

**Figure 3-figure supplement 1.** Effects of calmodulin antagonist **(a)** calmidazolium (CMDZ), **(b)** W-7 and **(c)** cytosolic  $\text{Ca}^{2+}$  chelator BAPTA-AM on phosphorylation state of S6K (T389) and Akt (S473). HEK293T cells were treated with different concentrations of indicated compound for 1 hr. The phosphorylation state of S6K and Akt was analyzed by immunoblotting. The plots show the dose-response curve of CMDZ, W-7 and BAPTA normalized by total S6K, respectively.
