# Supplementary material for: Regulation of mTORC1 by lysosomal calcium and calmodulin
Source: eLife journal article supplement (doi:10.7554/elife.19360), 2016-10-27
Supplement: supp [file elife-19360-supp-v1.zip › elife_poa_e19360_Figure_3_figure_supplement_2.pdf]

**Figure 3-figure supplement 2**

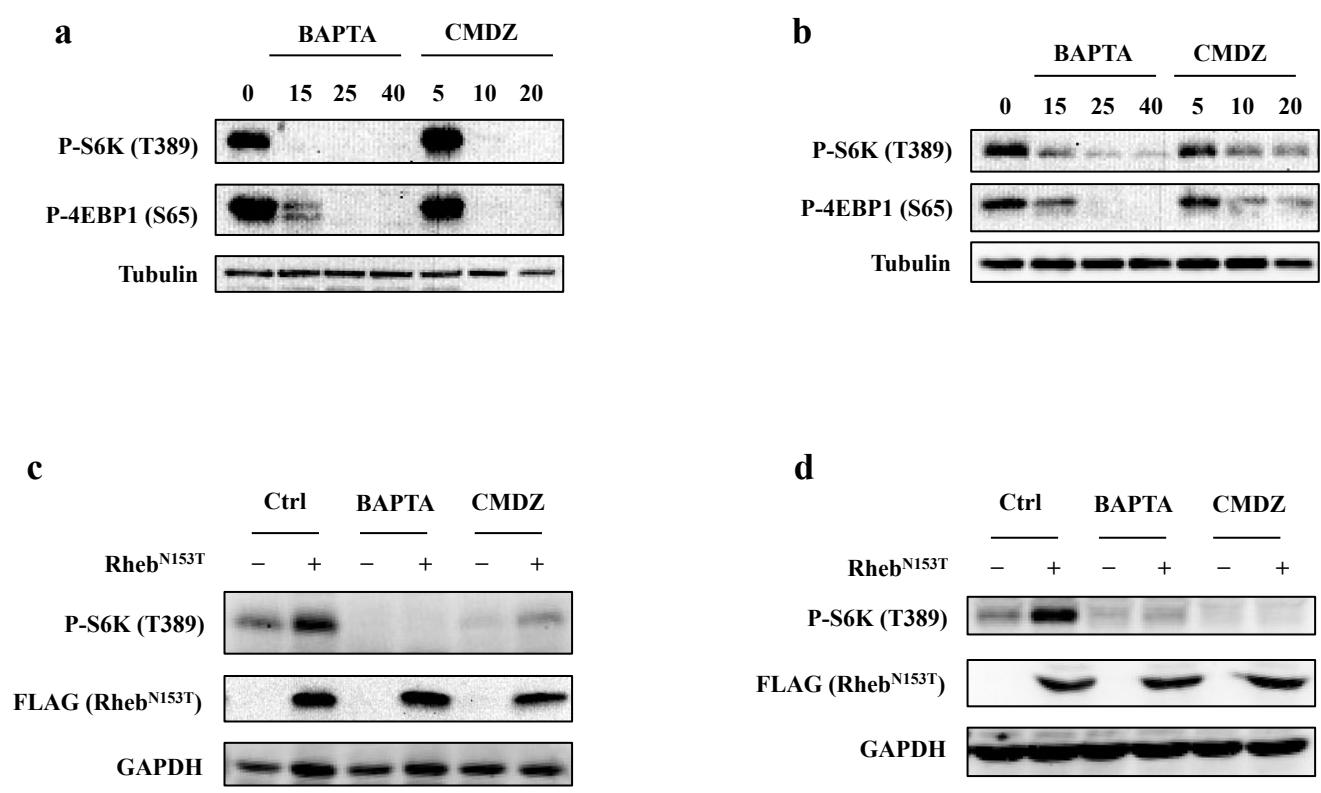

**Figure 3-figure supplement 2.** Effects of calmodulin antagonist calmidazolium (CMDZ) and cytosolic Ca<sup>2+</sup> chelator BAPTA-AM on mTOR signaling pathway in HUVEC and A549 cells. HUVEC **(a)** and A549 **(b)** cells were treated with different concentrations of BAPTA or CMDZ for 1 h. The phosphorylation state of S6K and 4EBP1 was analyzed by immunoblotting. HUVEC **(c)** and A549 **(d)** cells were transduced with lentivirus carrying constitutively active Rheb<sup>N153T</sup>. The transduced cells were treated with BAPTA or CMDZ for 1 h. The phosphorylation state of S6K was analyzed by immunoblotting.
