# Supplementary material for: Regulation of mTORC1 by lysosomal calcium and calmodulin
Source: eLife journal article supplement (doi:10.7554/elife.19360), 2016-10-27
Supplement: supp [file elife-19360-supp-v1.zip › elife_poa_e19360_Figure_4_figure_supplement_1.pdf]

# **Figure 4-figure supplement 1**

**a**

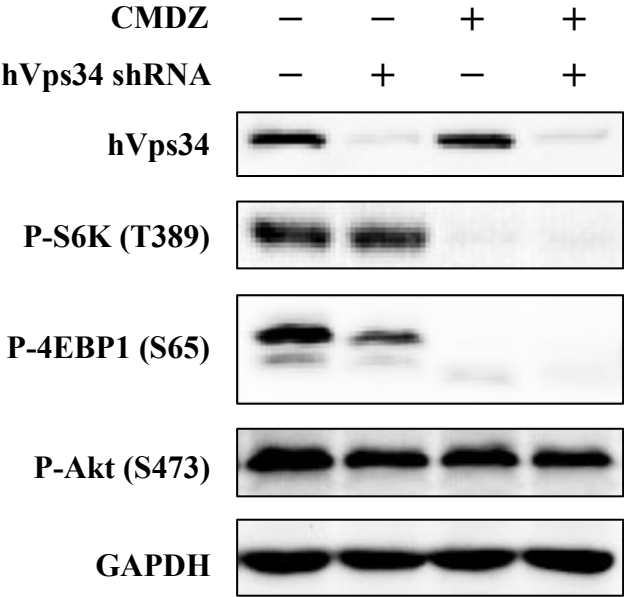

**b**

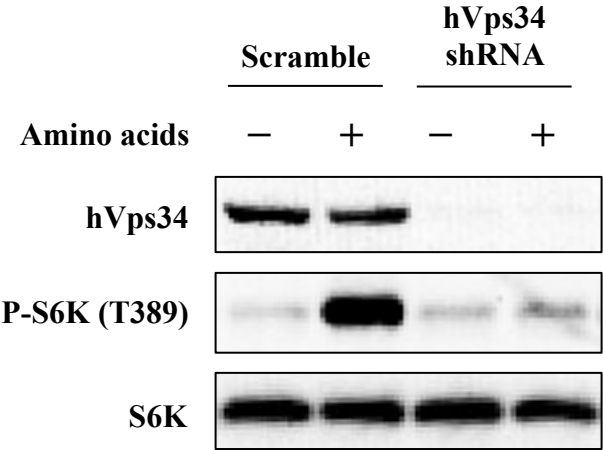

**Figure 4-figure supplement 1.** Effects of calmidazolium (CMDZ) on hVps34 depleted cells. **(a)** HEK 293T cells were transduced with lentivirus carrying scramble shRNA or shRNA targeting hVps34. 96 hours after puromycin selection, cells were treated with vehicle control or CMDZ (10  $\mu$ M) for 1 hour. **(b)** The same cells in (a) were starved with amino acids for 1 hours, and re-stimulated with amino acids for 10 min. Cells were lysed and subjected to immunoblotting.
