# Supplementary material for: Regulation of mTORC1 by lysosomal calcium and calmodulin
Source: eLife journal article supplement (doi:10.7554/elife.19360), 2016-10-27
Supplement: supp [file elife-19360-supp-v1.zip › elife_poa_e19360_Figure_4_figure_supplement_2.pdf]

Figure 4-figure supplement 2

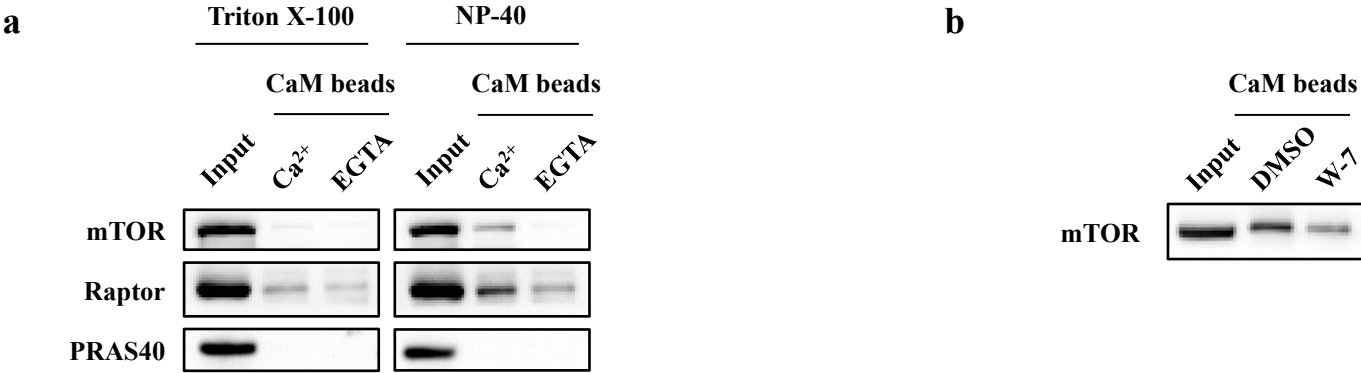

**Figure 4-figure supplement 2.** CaM interacts with mTORC1 independently of raptor or hVps34. **(a)** The interaction between CaM and mTORC1 is sensitive to detergents. Cell lysates were prepared from HEK293T cells in lysis buffer containing 1% Triton X-100 or 1% NP-40. Endogenous mTORC1 was precipitated by CaM sepharose in the presence of Ca<sup>2+</sup> or EGTA. **(b)** The interaction between CaM and mTOR is inhibited by the CaM antagonist W-7. Cell lysates were prepared from HEK293T cells in CHAPS buffer, and endogenous mTOR was precipitated by CaM sepharose in the presence of W-7 or vehicle control.
