# Supplementary material for: Regulation of mTORC1 by lysosomal calcium and calmodulin
Source: eLife journal article supplement (doi:10.7554/elife.19360), 2016-10-27
Supplement: supp [file elife-19360-supp-v1.zip › elife_poa_e19360_Figure_4_figure_supplement_3.pdf]

### Figure 4-figure supplement 3

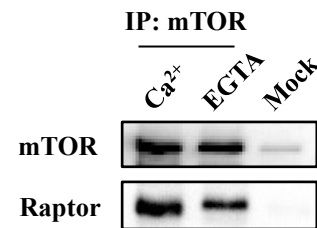

**Figure 4-figure supplement 3.** The presence or absence of Ca<sup>2+</sup> does not affect the association of mTORC1. Cell lysates were prepared from HEK293T in CHAPS buffer, and endogenous mTORC1 was immunoprecipitated by mTOR antibody. Rabbit IgG was used as mock immunoprecipitation.
