# Supplementary material for: Regulation of mTORC1 by lysosomal calcium and calmodulin
Source: eLife journal article supplement (doi:10.7554/elife.19360), 2016-10-27
Supplement: supp [file elife-19360-supp-v1.zip › elife_poa_e19360_Figure_4_figure_supplement_4.pdf]

Figure 4-figure supplement 4

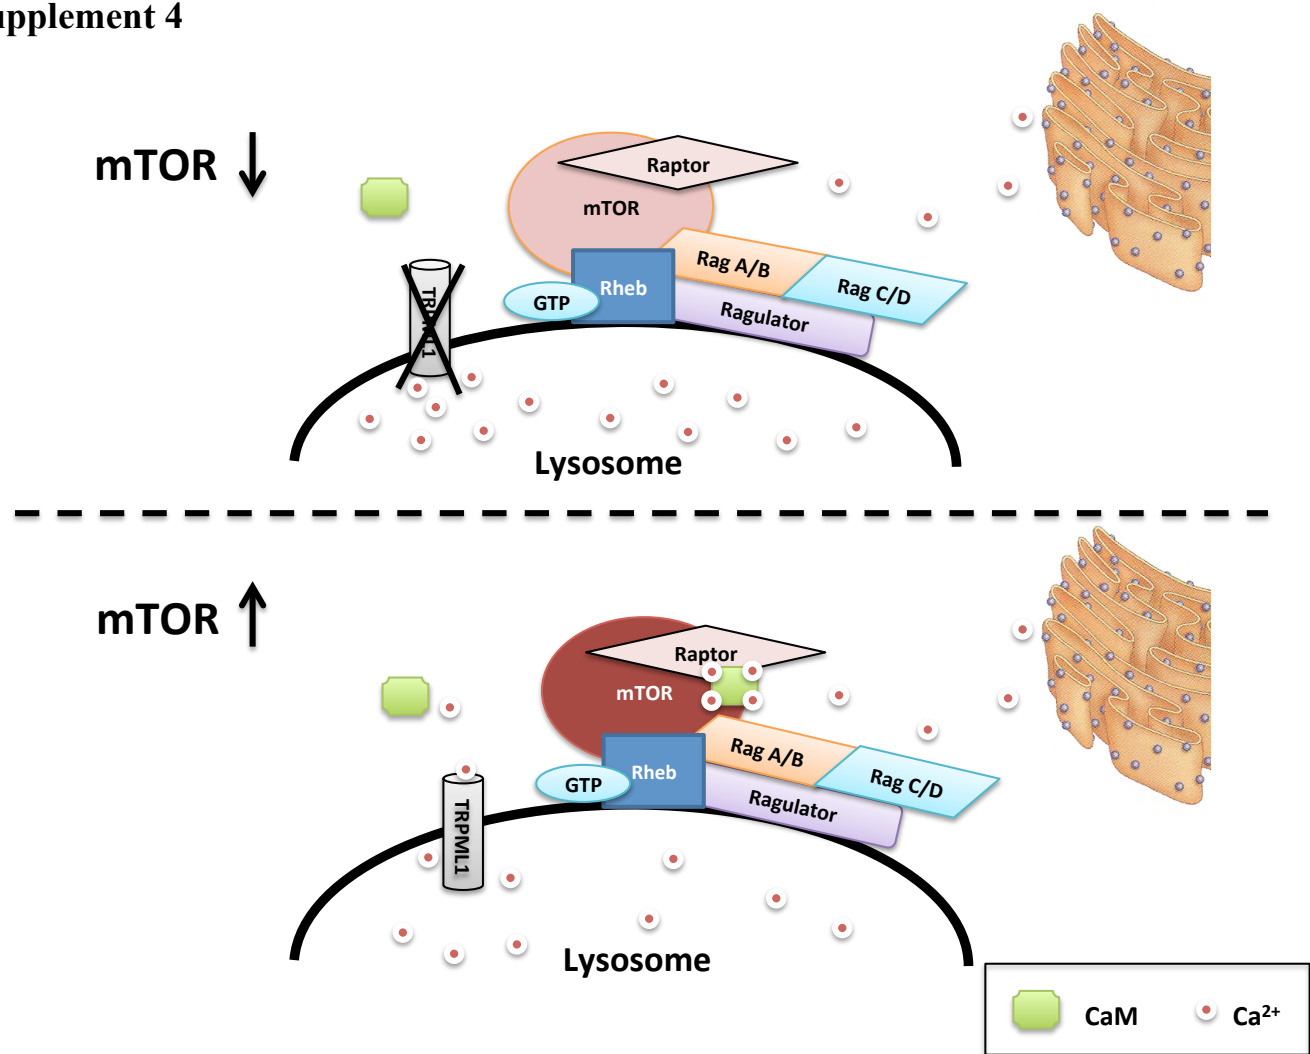

**Figure 4-figure supplement 4.** Proposed model of regulation of mTORC1 by TRPML1, lysosomal calcium and CaM. Upon the translocation of mTORC1 onto the lysosome through binding to GTP-Rheb, lysosomal  $\text{Ca}^{2+}$  released through TRPML1 enriches the local  $\text{Ca}^{2+}$  concentration, prompting the binding to and activation of CaM, which in turn interacts with mTORC1 and leading to a fully activation of the kinase activity.
